# Supplementary material
Source: PubMed Central journal article supplement (PMC3803134)
Supplement: NIHMS518385-supplement-01.pdf [file NIHMS518385-supplement-01.pdf]

## SUPPLEMENTAL INFORMATION

### **A Motif in the Vertebrate Telomerase N-terminal Linker of TERT Contributes to RNA Binding and Telomerase Activity and Processivity**

Michael Harkisheimer<sup>1§</sup>, Mark Mason<sup>1,2§</sup>, Elena Shuvaeva<sup>1,2</sup> and Emmanuel Skordalakes<sup>1,2\*</sup>

<sup>1</sup>*The Wistar Institute, 3601 Spruce St., Philadelphia, Pennsylvania 19104;* <sup>2</sup>*Department of Chemistry, University of Pennsylvania, Philadelphia, PA 19104;*

§These Authors contributed equally to the project

\*To whom correspondence may be addressed. E-mail: [skorda@wistar.org](mailto:skorda@wistar.org)

## SUPPLEMENTAL TABLES

**Table S1:** RNA oligos used in this study

| Name  | Sequence                                                |
|-------|---------------------------------------------------------|
| TBE   | aaaucacuccgucguuacggagugucuu                            |
| CR4/5 | cgagagcccguuguggucaguccggcugcccgaagaguuggucucugcugcuccg |

## SUPPLEMENTAL FIGURES

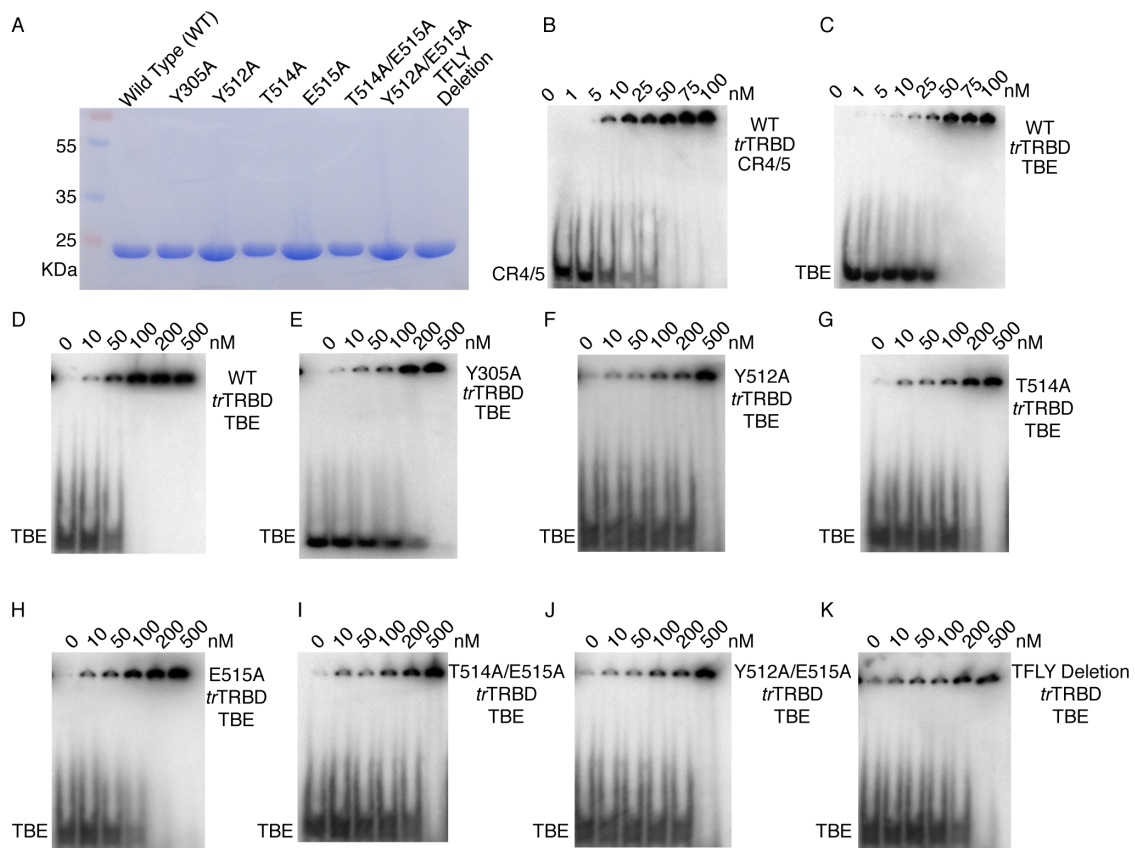

Harkisheimer\_Figure S1

**Figure S1. RNA binding properties of WT and mutant *trTRBD*:** A) A) SDS PAGE gel of purified *trTRB*; EMSA of B) CR4/5 with WT *trTRBD*; TBE with *trTRBD* C) WT (0 - 100 nM) D) WT (0 - 500 nM) E) Y305A; F) Y512A G) T514A H) E515A I) T514A/E515A J) Y512A/E515A and K) TFLY deletion.
